# Supplementary material
Source: MDPI journal article supplement (https://www.mdpi.com/2073-4441/13/23/3436)
Supplement: s1 [file s1]

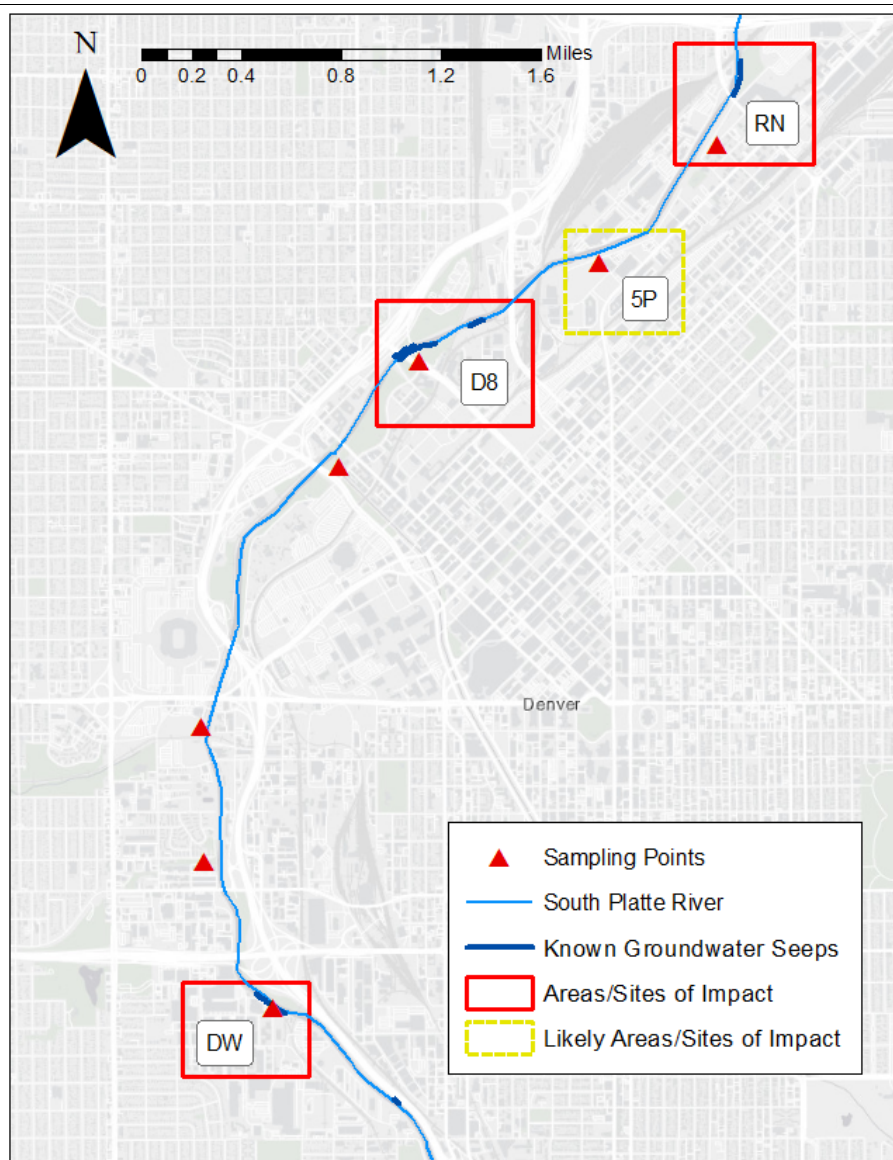

**Figure S1.** Map of groundwater seeps along the South Platte River, which was likely affecting flow at storm drain outfalls RN, 5P, D8, and DW.

**Table S1.** One-factor permutation test for difference in means results. Indicates statistical difference among groups ( $p < 0.05$ ).

| Analyte   | DOF Between Groups | DOF Within Groups | F-Statistic | p-value                 | Result                      |
|-----------|--------------------|-------------------|-------------|-------------------------|-----------------------------|
| Nitrate   | 9                  | 149               | 328.8       | $< 2.2 \times 10^{-16}$ | Statistically Different     |
| TN        | 9                  | 139               | 264.8       | $< 2.2 \times 10^{-16}$ | Statistically Different     |
| Ammonia   | 9                  | 136               | 2.3         | 0.02                    | Statistically Different     |
| P         | 9                  | 147               | 6.98        | $4.4 \times 10^{-7}$    | Statistically Different     |
| P (T)     | 9                  | 149               | 7.27        | $2.3 \times 10^{-7}$    | Statistically Different     |
| K         | 9                  | 149               | 30.95       | $< 2.2 \times 10^{-16}$ | Statistically Different     |
| K (T)     | 9                  | 149               | 30.76       | $< 2.2 \times 10^{-16}$ | Statistically Different     |
| E.coli    | 9                  | 138               | 2.85        | 0.06                    | NOT Statistically Different |
| Coliforms | 9                  | 139               | 1.82        | 0.056                   | NOT Statistically Different |
| TSS       | 9                  | 132               | 1.07        | 0.38                    | NOT Statistically Different |
| TOC       | 9                  | 139               | 4.31        | $1.7 \times 10^{-4}$    | Statistically Different     |
| As        | 9                  | 149               | 8.11        | $4.6 \times 10^{-8}$    | Statistically Different     |
| As (T)    | 9                  | 149               | 6.05        | $2.9 \times 10^{-6}$    | Statistically Different     |
| Cu        | 9                  | 139               | 1.83        | 0.06                    | NOT Statistically Different |
| Cu (T)    | 9                  | 139               | 1.55        | 0.12                    | NOT Statistically Different |
| Fe        | 9                  | 149               | 2.03        | 0.02                    | Statistically Different     |
| Fe (T)    | 9                  | 149               | 1.28        | 0.09                    | NOT Statistically Different |
| Mn        | 9                  | 149               | 7.66        | $1.1 \times 10^{-7}$    | Statistically Different     |
| Mn (T)    | 9                  | 149               | 6.6         | $9.0 \times 10^{-7}$    | Statistically Different     |
| Ni        | 9                  | 149               | 4.65        | $6.8 \times 10^{-5}$    | Statistically Different     |
| Ni (T)    | 9                  | 149               | 2.10        | 0.03                    | Statistically Different     |
| Se        | 9                  | 149               | 5.57        | $8.4 \times 10^{-6}$    | Statistically Different     |
| Se (T)    | 9                  | 149               | 5.71        | $6.1 \times 10^{-6}$    | Statistically Different     |
| Zn        | 9                  | 149               | 1.47        | 0.17                    | NOT Statistically Different |
| Zn (T)    | 9                  | 149               | 2.15        | 0.03                    | Statistically Different     |

DOF = Degrees of Freedom

ANOVA results were similar and produced the same conclusions, as expected.

**Table S2.** Spearman's Rho correlations between selected analytes.

|           | Nitrate      | Coliforms    | E.coli      | TOC          | TSS          | Ammonia      | TN           | P            | P (T)       | K           | K (T)       | As           | As (T)      | Ni          | Ni (T)      | Mn          | Mn (T)      | Se           | Se(T)        | Fe          | Fe (T)      | Zn          | Zn (T) |
|-----------|--------------|--------------|-------------|--------------|--------------|--------------|--------------|--------------|-------------|-------------|-------------|--------------|-------------|-------------|-------------|-------------|-------------|--------------|--------------|-------------|-------------|-------------|--------|
| Nitrate   | 1            |              |             |              |              |              |              |              |             |             |             |              |             |             |             |             |             |              |              |             |             |             |        |
| Coliforms | 0.08         | 1            |             |              |              |              |              |              |             |             |             |              |             |             |             |             |             |              |              |             |             |             |        |
| E.coli    | 0.04         | <b>0.51</b>  | 1           |              |              |              |              |              |             |             |             |              |             |             |             |             |             |              |              |             |             |             |        |
| TOC       | <b>-0.37</b> | 0.14         | 0.11        | 1            |              |              |              |              |             |             |             |              |             |             |             |             |             |              |              |             |             |             |        |
| TSS       | <b>-0.49</b> | 0.07         | 0.16        | <b>0.48</b>  | 1            |              |              |              |             |             |             |              |             |             |             |             |             |              |              |             |             |             |        |
| Ammonia   | -0.07        | <b>0.17</b>  | 0.13        | <b>0.36</b>  | 0.00         | 1            |              |              |             |             |             |              |             |             |             |             |             |              |              |             |             |             |        |
| TN        | <b>0.99</b>  | 0.05         | 0.03        | -0.03        | <b>-0.45</b> | -0.05        | 1            |              |             |             |             |              |             |             |             |             |             |              |              |             |             |             |        |
| P         | <b>0.32</b>  | 0.12         | 0.06        | -0.08        | -0.13        | 0.09         | 0.33         | 1            |             |             |             |              |             |             |             |             |             |              |              |             |             |             |        |
| P (T)     | <b>0.19</b>  | 0.10         | 0.04        | 0.04         | -0.10        | 0.15         | <b>0.19</b>  | <b>0.85</b>  | 1           |             |             |              |             |             |             |             |             |              |              |             |             |             |        |
| K         | <b>0.17</b>  | -0.13        | -0.07       | -0.10        | -0.01        | -0.03        | <b>0.19</b>  | <b>0.59</b>  | <b>0.54</b> | 1           |             |              |             |             |             |             |             |              |              |             |             |             |        |
| K (T)     | <b>0.17</b>  | -0.13        | -0.07       | -0.10        | -0.02        | -0.02        | <b>0.19</b>  | <b>0.60</b>  | <b>0.55</b> | <b>0.97</b> | 1           |              |             |             |             |             |             |              |              |             |             |             |        |
| As        | 0.09         | -0.13        | <b>0.19</b> | <b>-0.29</b> | <b>-0.22</b> | <b>-0.24</b> | 0.10         | <b>0.25</b>  | <b>0.18</b> | <b>0.32</b> | <b>0.39</b> | 1            |             |             |             |             |             |              |              |             |             |             |        |
| As (T)    | 0.00         | 0.00         | <b>0.22</b> | <b>-0.17</b> | -0.10        | <b>-0.17</b> | 0.00         | 0.22         | 0.20        | 0.29        | 0.32        | 0.72         | 1           |             |             |             |             |              |              |             |             |             |        |
| Ni        | -0.04        | <b>-0.26</b> | 0.08        | 0.05         | -0.11        | -0.05        | -0.04        | -0.08        | -0.10       | 0.07        | 0.14        | <b>0.42</b>  | <b>0.35</b> | 1           |             |             |             |              |              |             |             |             |        |
| Ni (T)    | -0.12        | 0.06         | 0.15        | 0.08         | 0.12         | 0.12         | -0.14        | -0.05        | -0.09       | 0.11        | 0.06        | 0.09         | <b>0.31</b> | <b>0.43</b> | 1           |             |             |              |              |             |             |             |        |
| Mn        | <b>-0.38</b> | -0.15        | 0.06        | <b>0.17</b>  | 0.14         | 0.16         | <b>-0.37</b> | 0.03         | 0.02        | <b>0.24</b> | <b>0.24</b> | <b>0.29</b>  | <b>0.28</b> | <b>0.39</b> | <b>0.34</b> | 1           |             |              |              |             |             |             |        |
| Mn (T)    | <b>-0.45</b> | -0.10        | 0.08        | <b>0.25</b>  | <b>0.32</b>  | <b>0.23</b>  | <b>-0.43</b> | 0.07         | 0.10        | <b>0.26</b> | <b>0.27</b> | <b>0.24</b>  | <b>0.27</b> | <b>0.35</b> | <b>0.36</b> | <b>0.94</b> | 1           |              |              |             |             |             |        |
| Se        | <b>0.38</b>  | <b>-0.18</b> | -0.02       | <b>-0.32</b> | <b>-0.34</b> | -0.11        | <b>0.37</b>  | 0.03         | -0.02       | -0.11       | -0.07       | <b>0.29</b>  | 0.13        | <b>0.34</b> | -0.03       | -0.04       | -0.08       | 1            |              |             |             |             |        |
| Se (T)    | <b>0.26</b>  | -0.07        | 0.00        | <b>-0.29</b> | <b>-0.39</b> | <b>-0.19</b> | <b>0.23</b>  | 0.00         | -0.07       | -0.11       | -0.11       | <b>0.26</b>  | <b>0.24</b> | <b>0.30</b> | 0.11        | 0.05        | -0.03       | <b>0.63</b>  | 1            |             |             |             |        |
| Fe        | <b>-0.23</b> | 0.16         | <b>0.18</b> | <b>0.49</b>  | 0.06         | <b>0.22</b>  | <b>-0.24</b> | 0.16         | <b>0.18</b> | 0.11        | 0.09        | 0.00         | <b>0.17</b> | 0.05        | <b>0.21</b> | <b>0.35</b> | <b>0.32</b> | <b>-0.35</b> | <b>-0.23</b> | 1           |             |             |        |
| Fe (T)    | <b>-0.63</b> | 0.08         | 0.16        | <b>0.65</b>  | <b>0.82</b>  | <b>0.38</b>  | <b>-0.60</b> | <b>-0.23</b> | -0.03       | -0.12       | -0.13       | <b>-0.23</b> | -0.10       | 0.01        | 0.14        | <b>0.30</b> | <b>0.44</b> | <b>-0.34</b> | <b>-0.40</b> | <b>0.35</b> | 1           |             |        |
| Zn        | <b>0.19</b>  | <b>0.34</b>  | <b>0.27</b> | 0.04         | <b>-0.18</b> | 0.00         | 0.16         | <b>0.30</b>  | <b>0.29</b> | <b>0.25</b> | <b>0.22</b> | 0.12         | <b>0.18</b> | -0.10       | 0.07        | 0.12        | 0.10        | <b>-0.22</b> | -0.11        | <b>0.39</b> | -0.04       | 1           |        |
| Zn (T)    | 0.15         | <b>0.38</b>  | <b>0.35</b> | <b>0.24</b>  | 0.06         | <b>0.20</b>  | 0.14         | <b>0.27</b>  | <b>0.30</b> | <b>0.21</b> | <b>0.19</b> | -0.02        | 0.08        | -0.15       | 0.09        | 0.10        | 0.14        | <b>-0.30</b> | <b>-0.29</b> | <b>0.46</b> | <b>0.19</b> | <b>0.77</b> | 1      |

Pollutants are assumed to be dissolved unless denoted with a (T) which indicates total concentration

**Bold** values indicate 95% significance

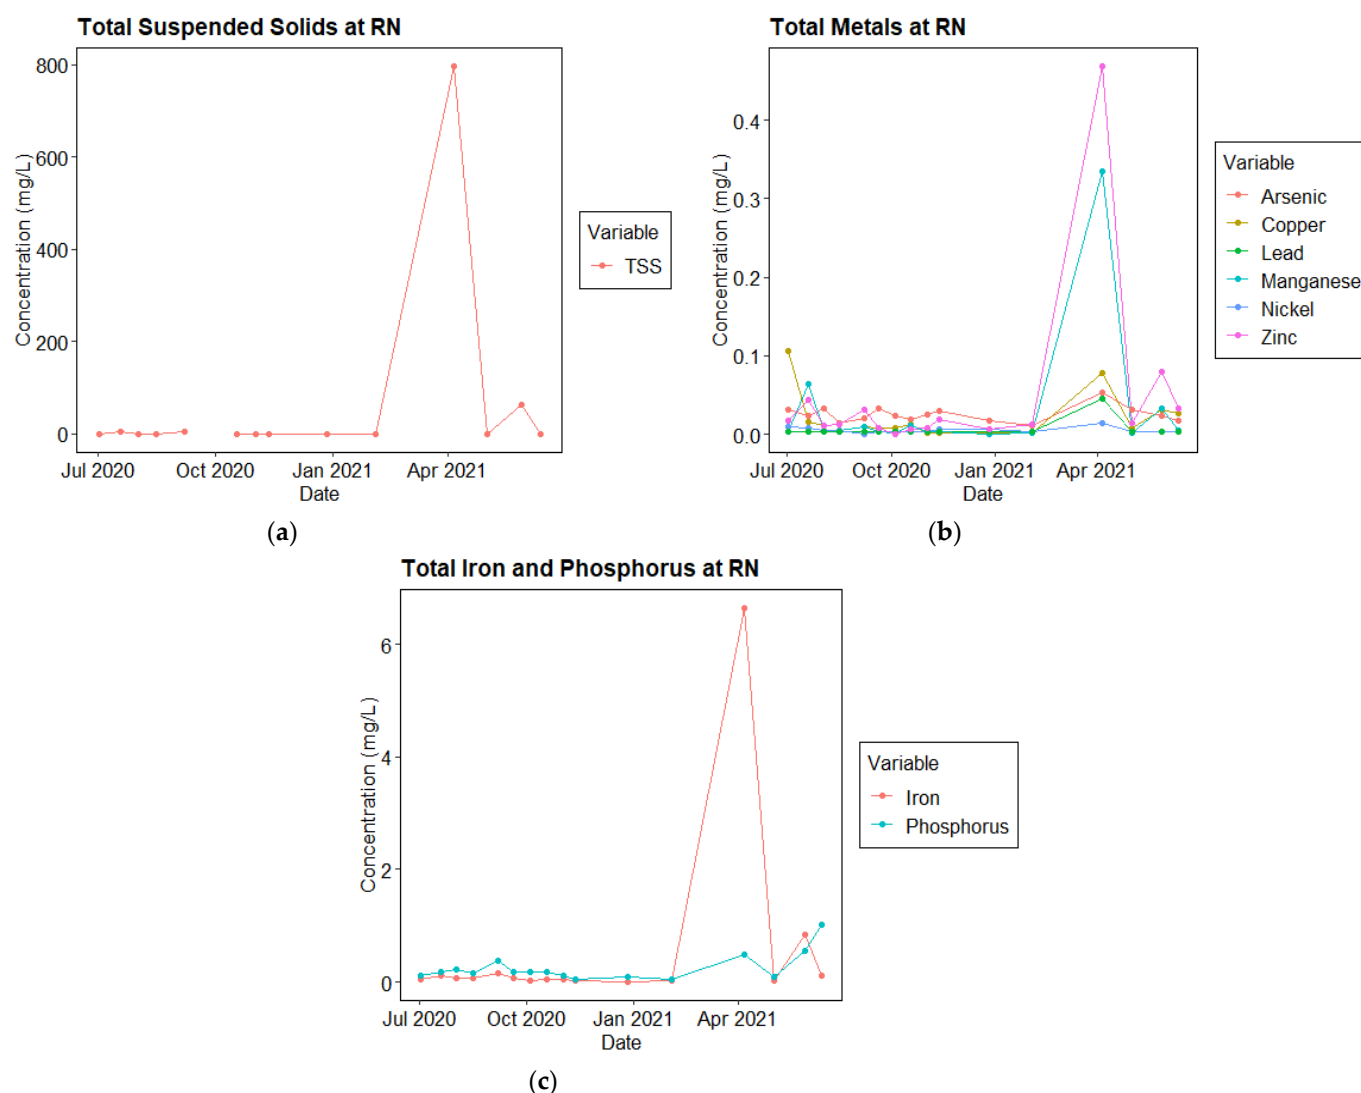

**Figure S2.** On April 6th and May 28th, RN experienced extremely high concentrations of TSS, which also resulted in greater amounts of total metals and total P pollution. Conditions of high TSS were determined to be derived from erosive activities of construction in the watershed. (a) The first figure shows the large increase in TSS on April 6th, 2021 and May 28th, 2021. (b) This figure shows the increase in total metal concentrations of As, Cu, Pb, Mn, Ni, and Zn under conditions of high TSS at RN. (c) This figure shows the increase in total Fe and P under conditions of high TSS at RN.
